# Supplementary material for: Religiosity and Psychotic Ideation in Stable Schizophrenia: A Role for Empathic Perspective-Taking
Source: MDPI journal article supplement (doi:10.3390/bs10020053), 2020-02-05
Supplement: s1 [file s1]

## SUPPLEMENTARY RESULTS

**Table S1.** Results of the multiple regression exploring the relationship between current religious beliefs and interpersonal reactivity (IRI) measures in patients with schizophrenia.

|                      | <b>Model 1</b><br><b>adjusted for age and gender</b><br><b>(R<sup>2</sup>= 0.09)</b> |         | <b>Model 2</b><br><b>+ psychotic symptoms</b><br><b>(R<sup>2</sup>= 0.25)</b> |         |
|----------------------|--------------------------------------------------------------------------------------|---------|-------------------------------------------------------------------------------|---------|
|                      | $\beta$                                                                              | p value | $\beta$                                                                       | p value |
| Age                  | 0.15                                                                                 | 0.189   | 0.18                                                                          | 0.107   |
| Female gender        | 0.22                                                                                 | 0.057   | 0.28                                                                          | 0.012   |
| PANSS positive score |                                                                                      |         | 0.40                                                                          | 0.002   |
| PANSS negative score |                                                                                      |         | -0.43                                                                         | 0.001   |

Current religious beliefs (Kapoggianis subscale) was considered the dependent variable. Statistical p values for the change in R<sup>2</sup> were: 0.045 (Model 1) and 0.001 (Model 2). None of the IRI dimensions entered the final equation. Therefore, only two models are shown. Abbreviations: IRI= Interpersonal reactivity index;  $\beta$ = standardized beta coefficient; PANSS= Positive and Negative Syndrome Scale.

**Table S2.** Results of the multiple regression exploring the relationship between childhood religious practice and interpersonal reactivity (IRI) measures in patients with schizophrenia.

|                      | <b>Model 1</b><br><b>adjusted for age and gender</b><br><b>(R<sup>2</sup>= 0.28)</b> |         | <b>Model 2</b><br><b>+ psychotic symptoms</b><br><b>(R<sup>2</sup>= 0.29)</b> |         | <b>Model 3</b><br><b>+ IRI dimensions</b><br><b>(R<sup>2</sup>= 0.34)</b> |         |
|----------------------|--------------------------------------------------------------------------------------|---------|-------------------------------------------------------------------------------|---------|---------------------------------------------------------------------------|---------|
|                      | $\beta$                                                                              | p value | $\beta$                                                                       | p value | $\beta$                                                                   | p value |
| Age                  | 0.23                                                                                 | 0.027   | 0.23                                                                          | 0.032   | 0.22                                                                      | 0.033   |
| Female gender        | 0.44                                                                                 | <0.001  | 0.45                                                                          | <0.001  | 0.39                                                                      | <0.001  |
| PANSS positive score |                                                                                      |         | 0.07                                                                          | 0.559   | 0.13                                                                      | 0.281   |
| PANSS negative score |                                                                                      |         | -0.06                                                                         | 0.620   | -0.06                                                                     | 0.642   |
| Perspective taking   |                                                                                      |         |                                                                               |         | 0.25                                                                      | 0.019   |

Childhood religious practice (Kapogiannis subscale) was considered the dependent variable. Statistical p values for the change in R<sup>2</sup> were: <0.001 (Model 1), 0.818 (Model 2) and 0.019 (Model 3). Abbreviations: IRI= Interpersonal reactivity index;  $\beta$ = standardized beta coefficient; PANSS= Positive and Negative Syndrome Scale.

**Table S3.** Results of the multiple regression exploring the relationship between moral relativism and m and interpersonal reactivity (IRI) measures in patients with schizophrenia.

|                      | <b>Model 1</b><br><b>adjusted for age and gender</b><br><b>(R<sup>2</sup>= 0.02)</b> |         | <b>Model 2</b><br><b>+ psychotic symptoms</b><br><b>(R<sup>2</sup>= 0.03)</b> |         | <b>Model 3</b><br><b>+ IRI dimensions</b><br><b>(R<sup>2</sup>= 0.12)</b> |         |
|----------------------|--------------------------------------------------------------------------------------|---------|-------------------------------------------------------------------------------|---------|---------------------------------------------------------------------------|---------|
|                      | $\beta$                                                                              | p value | $\beta$                                                                       | p value | $\beta$                                                                   | p value |
| Age                  | -0.14                                                                                | 0.238   | -0.13                                                                         | 0.285   | -0.15                                                                     | 0.224   |
| Female gender        | 0.07                                                                                 | 0.544   | 0.08                                                                          | 0.513   | -0.004                                                                    | 0.977   |
| PANSS positive score |                                                                                      |         | 0.04                                                                          | 0.800   | 0.11                                                                      | 0.420   |
| PANSS negative score |                                                                                      |         | -0.07                                                                         | 0.636   | -0.06                                                                     | 0.660   |
| Perspective taking   |                                                                                      |         |                                                                               |         | 0.33                                                                      | 0.008   |

Moral relativism (Kapogiannis subscale) was considered the dependent variable. Statistical p values for the change in R<sup>2</sup> were: 0.454 (Model 1), 0.893 (Model 2) and 0.008 (Model 3). Abbreviations: IRI= Interpersonal reactivity index;  $\beta$ = standardized beta coefficient; PANSS= Positive and Negative Syndrome Scale.

**Table S4.** Results of the multiple regression exploring the relationship between religiousness and interpersonal reactivity (IRI) measures in the control group.

| <b>Model 1</b><br><b>adjusted for age and gender</b><br><b>(R<sup>2</sup>= 0.04)</b> |         |         |
|--------------------------------------------------------------------------------------|---------|---------|
|                                                                                      | $\beta$ | p value |
| Age                                                                                  | -0.20   | 0.025   |
| Female gender                                                                        | -0.014  | 0.868   |

Religiousness (Kapogiannis scale total score) was considered the dependent variable. Statistical p values for the change in R<sup>2</sup> were: 0.078 (Model 1). None of the IRI dimensions entered the final equation. Therefore, only one model is shown. Abbreviations: IRI= Interpersonal reactivity index;  $\beta$ = standardized beta coefficient.

**Table S5.** Results of the multiple regression exploring the relationship between current religious beliefs and interpersonal reactivity (IRI) measures in the control group.

| <b>Model 1</b><br><b>adjusted for age and gender</b><br><b>(R<sup>2</sup>= 0.03)</b> |         |         |
|--------------------------------------------------------------------------------------|---------|---------|
|                                                                                      | $\beta$ | p value |
| Age                                                                                  | 0.17    | 0.051   |
| Female gender                                                                        | 0.008   | 0.928   |

Current religious beliefs (Kapogiannis subscale) was considered the dependent variable. Statistical p values for the change in R<sup>2</sup> were: 0.148 (Model 1). None of the IRI dimensions entered the final equation. Therefore, only one model is shown. Abbreviations: IRI= Interpersonal reactivity index;  $\beta$ = standardized beta coefficient.

**Table S6.** Results of the multiple regression exploring the relationship between childhood religious practice and interpersonal reactivity (IRI) measures in the control group.

| <b>Model 1</b><br><b>adjusted for age and gender</b><br><b>(R<sup>2</sup>= 0.07)</b> |         |         |
|--------------------------------------------------------------------------------------|---------|---------|
|                                                                                      | $\beta$ | p value |
| Age                                                                                  | 0.24    | 0.006   |
| Female gender                                                                        | 0.14    | 0.111   |

Childhood religious practice (Kapogiannis subscale) was considered the dependent variable. Statistical p values for the change in R<sup>2</sup> were: 0.007 (Model 1). None of the IRI dimensions entered the final equation. Therefore, only one model is shown. Abbreviations: IRI= Interpersonal reactivity index;  $\beta$ = standardized beta coefficient.

**Table S7.** Results of the multiple regression exploring the relationship between moral relativism and interpersonal reactivity (IRI) measures in the control group.

| <b>Model 1</b><br><b>adjusted for age and gender</b><br><b>(R<sup>2</sup>= 0.09)</b> |         |         | <b>Model 2</b><br><b>+ IRI dimensions</b><br><b>(R<sup>2</sup>= 0.18)</b> |         |
|--------------------------------------------------------------------------------------|---------|---------|---------------------------------------------------------------------------|---------|
|                                                                                      | $\beta$ | p value | $\beta$                                                                   | p value |
| Age                                                                                  | 0.01    | 0.953   | 0.01                                                                      | 0.876   |
| Female gender                                                                        | -0.30   | <0.001  | -0.28                                                                     | 0.001   |
| Perspective taking                                                                   |         |         | 0.30                                                                      | <0.001  |

Moral relativism (Kapogiannis subscale) was considered the dependent variable. Statistical p values for the change in R<sup>2</sup> were: 0.002 (Model 1) and <0.001 (Model 2). Abbreviations: IRI= Interpersonal reactivity index;  $\beta$ = standardized beta coefficient.

Further analysis involving other variables are available. Authors will provide them to interested readers on request,
